# Supplementary material for: Synthesis of parent amido (NH2)-bridged dinuclear complexes of ruthenium and iridium by stepwise transfer hydrogenation of μ-azido complexes
Source: Royal Society of Chemistry journal article supplement (doi:10.1039/b902810m), 2009-01-01
Supplement: b902810m.pdf [file b902810m.pdf]

# Synthesis of parent amido (NH<sub>2</sub>)-bridged dinuclear complexes of ruthenium and iridium by stepwise transfer hydrogenation of $\mu$ -azido complexes

Takashi Kimura, Hiroko Arita, Koji Ishiwata, Shigeki Kuwata\* and Takao Ikariya\*

*Department of Applied Chemistry, Graduate School of Engineering, Tokyo Institute of Technology, O-okayama, Meguro-ku, Tokyo 152-8552, Japan. Fax: +81 3 5734 2637; Tel: +81 3 5734 2150; E-mail: skuwata@apc.titech.ac.jp; tikariya@apc.titech.ac.jp*

## Experimental Details

**Caution.** Transition-metal azido complexes are potentially explosive, so that should be handled with great caution, although we did not have any accident in the following reactions.

**General.** All manipulations were performed under an atmosphere of argon using standard Schlenk technique unless otherwise specified. Solvents were dried by refluxing over sodium benzophenone ketyl (THF, toluene, diethyl ether and hexane), CaH<sub>2</sub> (CH<sub>2</sub>Cl<sub>2</sub> and 2-propanol) and distilled before use. Acetone, 1,2-dichloromethane and pentane (anhydrous) were purchased from Kanto Chemical and used as received. [(CymRuCl)<sub>2</sub>( $\mu$ -N<sub>3</sub>)<sub>2</sub>]<sup>1</sup> (Cym =  $\eta^6$ -*p*-cymene) and [(Cp\*IrCl)<sub>2</sub>( $\mu$ -H)<sub>2</sub>]<sup>2</sup> were prepared according to the literature. <sup>1</sup>H NMR (300.4 MHz) were recorded in C<sub>6</sub>D<sub>6</sub> from on a JEOL JNM-LA300 spectrometer; chemical shifts are referenced to the residual nondeuterated benzene at  $\delta$  7.15. Infrared spectra were recorded on a JASCO FT/IR-610 spectrometer. Elemental analysis were performed by the Analytical Facility at the Research Laboratory of Resources Utilization, Tokyo Institute of Technology or on a Perkin-Elmer 2400II CHN analyzer.

**Preparation of [(CymRuCl)<sub>2</sub>( $\mu$ -NH<sub>2</sub>)( $\mu$ -N<sub>3</sub>)] (1a).** To a solution of [(CymRuCl)<sub>2</sub>( $\mu$ -N<sub>3</sub>)<sub>2</sub>] (299.7 mg, 0.4791 mmol) in THF (30 mL) were added 2-propanol (10 mL) and Na<sub>2</sub>CO<sub>3</sub> (101.5 mg, 0.9576 mmol) and stirred for 31 h at room temperature. The resultant reddish orange solution was evaporated to dryness, and extracted with toluene (60 mL). Recrystallization from CH<sub>2</sub>Cl<sub>2</sub>/diethyl ether (3 mL/15 mL) afforded **1a** as reddish orange crystals (178.5 mg, 0.2977 mmol, 62%).  $\delta_{\text{H}}$  1.02 (d, 12H, <sup>3</sup>J<sub>HH</sub> = 6.9 Hz, CH(CH<sub>3</sub>)<sub>2</sub>), 1.88 (s, 6H, C<sub>6</sub>H<sub>4</sub>CH<sub>3</sub>), 2.70 (m, 2H, CH(CH<sub>3</sub>)<sub>2</sub>), 4.58, 4.66, 4.73, 4.85 (d, 2H each, <sup>3</sup>J<sub>HH</sub> = 5.5 Hz, C<sub>6</sub>H<sub>4</sub>).  $\nu_{\text{max}}$ (KBr)/cm<sup>-1</sup> 3246, 3328 (NH), 2041 (N<sub>3</sub>). Anal. Calcd for C<sub>20</sub>H<sub>30</sub>Cl<sub>2</sub>N<sub>4</sub>Ru<sub>2</sub>: C, 40.07; H, 5.04; N, 9.35. Found: C, 39.93; H, 5.09; N, 9.29.

**Preparation of [(Cp\*IrCl)<sub>2</sub>( $\mu$ -N<sub>3</sub>)<sub>2</sub>].** To a solution of [(Cp\*IrCl)<sub>2</sub>]<sub>2</sub> (2.0029 g, 2.5140 mmol) in acetone (60 mL) was added NaN<sub>3</sub> (327.1 mg, 5.0315 mmol) and the mixture was stirred for 12 h at room temperature. After removal of the solvent in vacuo, the residue was extracted with 1,2-dichloroethane/CH<sub>2</sub>Cl<sub>2</sub> (80 mL, 1:2 v/v). Recrystallization from dichloroethane/diethyl ether (10 mL/40 mL) afforded the title compound as orange crystals (1.8802 g, 2.3217 mmol, 92%).  $\delta_{\text{H}}$  1.35 (s, 30H, Cp\*).  $\nu_{\text{max}}$ (KBr)/cm<sup>-1</sup> 2060 (N<sub>3</sub>). Anal. Calcd for C<sub>20</sub>H<sub>32</sub>Cl<sub>2</sub>Ir<sub>2</sub>N<sub>4</sub>: C, 29.66; H, 3.73; N, 10.38. Found: C, 29.60; H, 3.64; N, 10.20.

**Preparation of [(Cp\*IrCl)<sub>2</sub>( $\mu$ -NH<sub>2</sub>)( $\mu$ -N<sub>3</sub>)] (1b).** To a solution of [(Cp\*IrCl)<sub>2</sub>( $\mu$ -N<sub>3</sub>)<sub>2</sub>] (302.3 mg, 0.3733 mmol) in THF (35 mL) was

added 2-propanol (29  $\mu$ L, 0.373 mmol) and stirred for 5 h at 50 °C. After removal of the solvent in vacuo, the residue was recrystallized from THF/pentane (5 mL/20 mL) at -30 °C. The brown crystals of **1b** that formed were filtered off and dried in vacuo (217.2 mg, 0.2771 mmol, 74%).  $\delta_{\text{H}}$  1.39 (s, 30H, Cp\*).  $\nu_{\text{max}}$ (KBr)/cm<sup>-1</sup> 3311, 3349 (NH), 2055 (N<sub>3</sub>). The elemental analysis reproducibly gave a nitrogen value slightly less than the calculated one, which may be ascribed to facile loss of the azido nitrogens. Anal. Calcd for C<sub>20</sub>H<sub>32</sub>Cl<sub>2</sub>Ir<sub>2</sub>N<sub>4</sub>: C, 30.65; H, 4.11; N, 7.15. Found: C, 31.09; H, 4.15; N, 6.56.

**Preparation of [(CymRuCl)<sub>2</sub>( $\mu$ -NH<sub>2</sub>)( $\mu$ -H)] (2a).** (a) To a solution of [(CymRuCl)<sub>2</sub>( $\mu$ -N<sub>3</sub>)<sub>2</sub>] (48.4 mg, 0.0774 mmol) in toluene (12 mL) were added 2-propanol (3 mL) and triethylamine (22  $\mu$ L, 0.16 mmol), and the mixture was stirred for 14 h at 80 °C. The resultant red solution was evaporated to dryness, and extracted with toluene (18 mL). Recrystallization from THF/pentane (1 mL/5 mL) at -30 °C afforded **2a** as reddish orange crystals (26.7 mg, 0.0478 mmol, 62%).  $\delta_{\text{H}}$  -11.08 (s, 1H, Ru<sub>2</sub>H), 1.24, 1.25 (d, 12H each, <sup>3</sup>J<sub>HH</sub> = 6.7 Hz, CH(CH<sub>3</sub>)<sub>2</sub>), 2.02 (s, 6H, C<sub>6</sub>H<sub>4</sub>CH<sub>3</sub>), 2.80 (m, 2H, CH(CH<sub>3</sub>)<sub>2</sub>), 3.74 (br, 2H, NH<sub>2</sub>), 4.68, 4.74, 4.94, 5.07 (d, 2H each, <sup>3</sup>J<sub>HH</sub> = 5.5 Hz, C<sub>6</sub>H<sub>4</sub>).  $\nu_{\text{max}}$ (KBr)/cm<sup>-1</sup> 3356, 3447 (NH). Anal. Calcd for C<sub>20</sub>H<sub>31</sub>Cl<sub>2</sub>NRu<sub>2</sub>: C, 43.01; H, 5.59; N, 2.51. Found: C, 43.31; H, 5.65; N, 2.46.

(b) To a solution of **1a** (40.4 mg, 0.0674 mmol) in THF (10 mL) were added 2-propanol (3 mL) and triethylamine (10  $\mu$ L, 0.067 mmol) and stirred for 5 days at 50 °C. The resultant red solution was evaporated to dryness, and extracted with toluene (18 mL). Recrystallization from THF/pentane (1 mL/5 mL) at -30 °C afforded **2a** as reddish orange crystals (15.3 mg, 0.0274 mmol, 41%).

**Preparation of [(Cp\*IrCl)<sub>2</sub>( $\mu$ -NH<sub>2</sub>)( $\mu$ -H)] (2b).** (a) To a solution of [(Cp\*IrCl)<sub>2</sub>( $\mu$ -N<sub>3</sub>)<sub>2</sub>] (57.3 mg, 0.0708 mmol) in THF (10 mL) were added 2-propanol (3 mL) and Na<sub>2</sub>CO<sub>3</sub> (15.0 mg, 0.142 mmol), and the mixture was stirred in the dark for 24 h at 50 °C. The resultant orange solution was evaporated to dryness, and extracted with toluene (12 mL). Recrystallization from THF/hexane (2 mL/8 mL) at -30 °C afforded **2b** as orange crystals (44.3 mg, 0.0596 mmol, 84%).  $\delta_{\text{H}}$  -14.84 (s, 1H, Ir<sub>2</sub>H), 1.74 (s, 30H, Cp\*), 3.09 (br, 2H, NH<sub>2</sub>).  $\nu_{\text{max}}$ (KBr)/cm<sup>-1</sup> 3294, 3278 (NH). Anal. Calcd for C<sub>20</sub>H<sub>33</sub>Cl<sub>2</sub>Ir<sub>2</sub>N: C, 32.34; H, 4.48; N, 1.89. Found: C, 32.14; H, 4.50; N, 1.85.

(b) To a solution of **1b** (52.0 mg, 0.0663 mmol) in THF (8 mL) were added 2-propanol (1 mL) and Na<sub>2</sub>CO<sub>3</sub> (14.0 mg, 0.133 mmol) and the mixture was stirred for 6 h at 50 °C. The resultant yellow solution was evaporated to dryness, and extracted with toluene (12

100 mL). Recrystallization from THF/pentane (2.5 mL/10 mL) at –  
30 °C afforded **2b** as orange crystals (32.1 mg, 0.0432 mmol, 65%).  
(c) To a solution of [(Cp\*IrCl)<sub>2</sub>(μ-H)<sub>2</sub>] (302.5 mg, 0.4156 mmol) in  
THF (50 mL) was added NaN<sub>3</sub> (27.0 mg, 0.415 mmol) and  
105 [(C<sub>2</sub>H<sub>5</sub>)<sub>3</sub>NH]Cl (120.0 mg, 0.8718 mmol), and the mixture was  
stirred for 13 h at 50 °C. The resultant red orange solution was  
evaporated to dryness, and extracted with toluene (60 mL).  
Recrystallization from THF/diethyl ether (4 mL/15 mL) afforded  
**2b** as orange crystals (66.1 mg, 0.089 mmol, 21%).

110 **X-ray Diffraction Studies.** Diffraction experiments were  
performed on a Rigaku Saturn CCD area detector with graphite  
monochromated Mo-Kα radiation (λ = 0.710 70 Å). Single  
crystals suitable for X-ray analyses were mounted on glass fibers.  
Intensity data were corrected for Lorentz–polarization effects and  
115 for absorption.

Structure solution and refinements were carried out by using the  
CrystalStructure program package.<sup>3</sup> The heavy-atom positions  
were determined by a direct methods program (SIR92<sup>4</sup> for **1a** and  
**2a**, SIR2002<sup>5</sup> for **2b**) and remaining non-hydrogen atoms were  
120 found by subsequent Fourier syntheses. All non hydrogen atoms  
were refined anisotropically by full-matrix least-squares techniques  
based on F<sup>2</sup>. All hydrogen atoms except for the hydride hydrogen  
atom in **2a** and **2b** were placed at calculated positions and included  
in the final stages of the refinements. The hydride hydrogens were  
125 found in Fourier syntheses and refined with fixed (**2a**) or isotropic  
(**2b**) thermal parameters. The atomic scattering factors were taken  
from ref 6, and anomalous dispersion effects were included; the  
values of Δf' and Δf'' were taken from ref 7. The data completeness

value for **2a** (93%) proved to be lower than standard due to the  
130 mosaicity of the crystal.

## References

- 1 R. S. Bates, M. J. Begley and A. H. Wright, *Polyhedron*, 1990, **9**, 1113.
- 2 D. S. Gill and P. M. Maitlis, *J. Organomet. Chem.*, 1975, **87**, 359.
- 135 3 *CrystalStructure 3.8: Crystal Structure Analysis Package*, Rigaku and Rigaku/MSK, The Woodlands, TX 77381 USA, 2000–2006.
- 4 A. Altomare, G. Cascarano, C. Giacovazzo, A. Guagliardi, M. Burla, G. Polidori and M. Camalli, *J. Appl. Cryst.*, 1994, **27**, 435.
- 5 M. C. Burla, M. Camalli, B. Carrozzini, G. L. Cascarano, C. Giacovazzo, G. Polidori and R. Spagna, *J. Appl. Cryst.*, 2003, **36**, 1103.
- 140 6 *International Tables for X-ray Crystallography*; Kynoch Press: Birmingham, England, 1974; Vol. IV.
- 7 *International Tables for X-ray Crystallography*; Kluwer Academic Publishers: Boston, MA, 1992; Vol. C.
- 145
